# Supplementary material
Source: PubMed Central journal article supplement (PMC3131996)
Supplement: cdd2010114x3.pdf [file cdd2010114x3.pdf]

**Supplement Table 1: The sequence of the PCR primers used for construction of various deletion mutations of Bcl-2 and DGR region of INrf2.**

| <b>Constructs</b>         | <b>Sequence of the PCR prime used</b>                                                                                                                                                             | <b>Templet DNA</b>              |
|---------------------------|---------------------------------------------------------------------------------------------------------------------------------------------------------------------------------------------------|---------------------------------|
| <b>Bcl-2 V5</b>           | FP : 5' aaccccatggcgcaagccgggagaacagggtat3'<br>RP: 5'cttggtggcccaggtatgcacccagagtgatgca 3'                                                                                                        | <b>Bcl2 pcDNA</b>               |
| <b>Bcl2 K17A –V5</b>      | FP:5'agatcgtgatgGCGtacatacattataagc3'<br>RP: 5'catcacgatctcccggttatcatacctgt3'                                                                                                                    | <b>Methylated pcDNA Bcl2-V5</b> |
| <b>Bcl2 K22A –V5</b>      | FP: 5'acatacattatGCCctgtcacagaggggt3'<br>RP: 5'ataatgtatgtacttcatcacgatctccc3'                                                                                                                    | <b>Methylated pcDNA Bcl2-V5</b> |
| <b>Bcl2 K214A –V5</b>     | FP: 5'tggetgtctctgGCCaccctgtcagcctggcc3'<br>RP:5'cagagacagccaggagaaatcaaacagagg3'                                                                                                                 | <b>Methylated pcDNA Bcl2-V5</b> |
| <b>Bcl2 K236A –V5</b>     | FP: 5'tacctggggcacGCCaagggcaattctgc3'<br>RP: 5'gtggcccaggtatgcacccagagtgatgca3'                                                                                                                   | <b>Methylated pcDNA Bcl2-V5</b> |
| <b>Bcl2W185A-V5</b>       | FP: 5'gaaccggcatctgcacaccGCTatccaggataac 3'<br>RP: 5' ggtgtgcagatgccggtcaggtactcagtcacat 3'                                                                                                       | <b>Methylated pcDNA Bcl2-V5</b> |
| <b>Bcl2G190AG191A -V5</b> | FP: 5'ctggatccaggataacGCTGCTtgggatgccttt 3'<br>RP: 5'gttatcctggatccaggtgtgcagatgccggtt 3'                                                                                                         | <b>Methylated pcDNA Bcl2-V5</b> |
| <b>Flag-Bcl-2</b>         | FP : 5'aatgcctctagagcgcaagccgggagaacagggtatgat3'<br>RP :5'catgccgctagccttgtggcccaggtatgcacccag 3'                                                                                                 | <b>pcDNABcl-2</b>               |
| <b>ΔBH4-Bcl-2</b>         | FP:5' aatgcctctagagcgcaagccgggagaacagggtatgat3'<br>RP:5'aatccctcgagatcatacctgttctcccggcttgcgc3'<br>FP:5'aatgccctcgaggatgctggagatgccggacggcgcccc3'<br>RP:5'catgccgctagccttgtggcccaggtatgcacccag3'. | <b>pcDNABcl-2</b>               |
| <b>For ΔBH3-Bcl-2</b>     | FP:5'aatgcctctagagcgcaagccgggagaacagggtatgat3'<br>RP:5'aatccctcgagcagatggaccacaggtggcacagg3'<br>FP:5'aatgccctcgaggacttcgagagatgtccagtcagctg3'<br>RP:5'catgccgctagccttgtggcccaggtatgcacccag3'      | <b>pcDNABcl-2</b>               |
| <b>For ΔBH1-Bcl-2</b>     | FP:5'aatgcctctagagcgcaagccgggagaacagggtatgat3'<br>RP:5'aatccctcgaggaagagtctctcaccaccgtggc3'<br>FP:5'aatgccctcgaggtggagagcgtcaacaggagatg3'<br>RP:5'catgccgctagccttgtggcccaggtatgcacccag3'          | <b>pcDNABcl-2</b>               |
| <b>For ΔBH2-Bcl-2</b>     | FP:5'aatgcctctagagcgcaagccgggagaacagggtatgat3'<br>RP:5'aatccctcgaggatccaggtgtgcagatgccggttcag3'<br>FP:5'aatgccctcgagatgcgacctctgttgatttctcc3'<br>RP:5'catgccgctagccttgtggcccaggtatgcacccag3'      | <b>pcDNABcl-2</b>               |
| <b>FLAG-INrf2</b>         | FP:5'catggcggtagaccaccgcatgcagcccgaaccaagc3'<br>RP:5'tggccaggtaccgaggtacagttttgtgatcaatt3'.                                                                                                       | <b>INrf2 pcDNA</b>              |
| <b>ΔDGRmINrf2(550)</b>    | FP:5'cgggaattctatgaggcatcaccgtgtgcgctg3'<br>RP:5'cgcggtaccctgtcatgcgggtcacctcactc3'                                                                                                               | <b>INrf2 pcDNA</b>              |
| <b>ΔDGR mINrf2(500)</b>   | FP:5'cgggaattctatgaggcatcaccgtatgtgcgctg3'<br>RP:5'cgcggtaccctgtcatgcgggtcacctcactc3'                                                                                                             | <b>INrf2 pcDNA</b>              |
| <b>ΔDGRmINrf2(450)</b>    | FP:5'cgggaattcttggtatctagtcgcccgaatgttg3'<br>RP:5'cgcggtaccctgtcatgcgggtcacctcactc3'                                                                                                              | <b>INrf2 pcDNA</b>              |
| <b>ΔDGRmINrf2(400)</b>    | FP:5'cgggaattctaccaaccagtgtgcacctgtgcc3'<br>RP:5'cgcggtaccctgtcatgcgggtcacctcactc3'                                                                                                               | <b>INrf2 pcDNA</b>              |
| <b>ΔDGRmINrf2(350)</b>    | FP:5'cgggaattctggtcctggtgcgacctgcccag3'<br>RP:5'cgcggtaccctgtcatgcgggtcacctcactc3'                                                                                                                | <b>INrf2 pcDNA</b>              |
