# Supplementary material
Source: PubMed Central journal article supplement (PMC3131996)

Figure S1

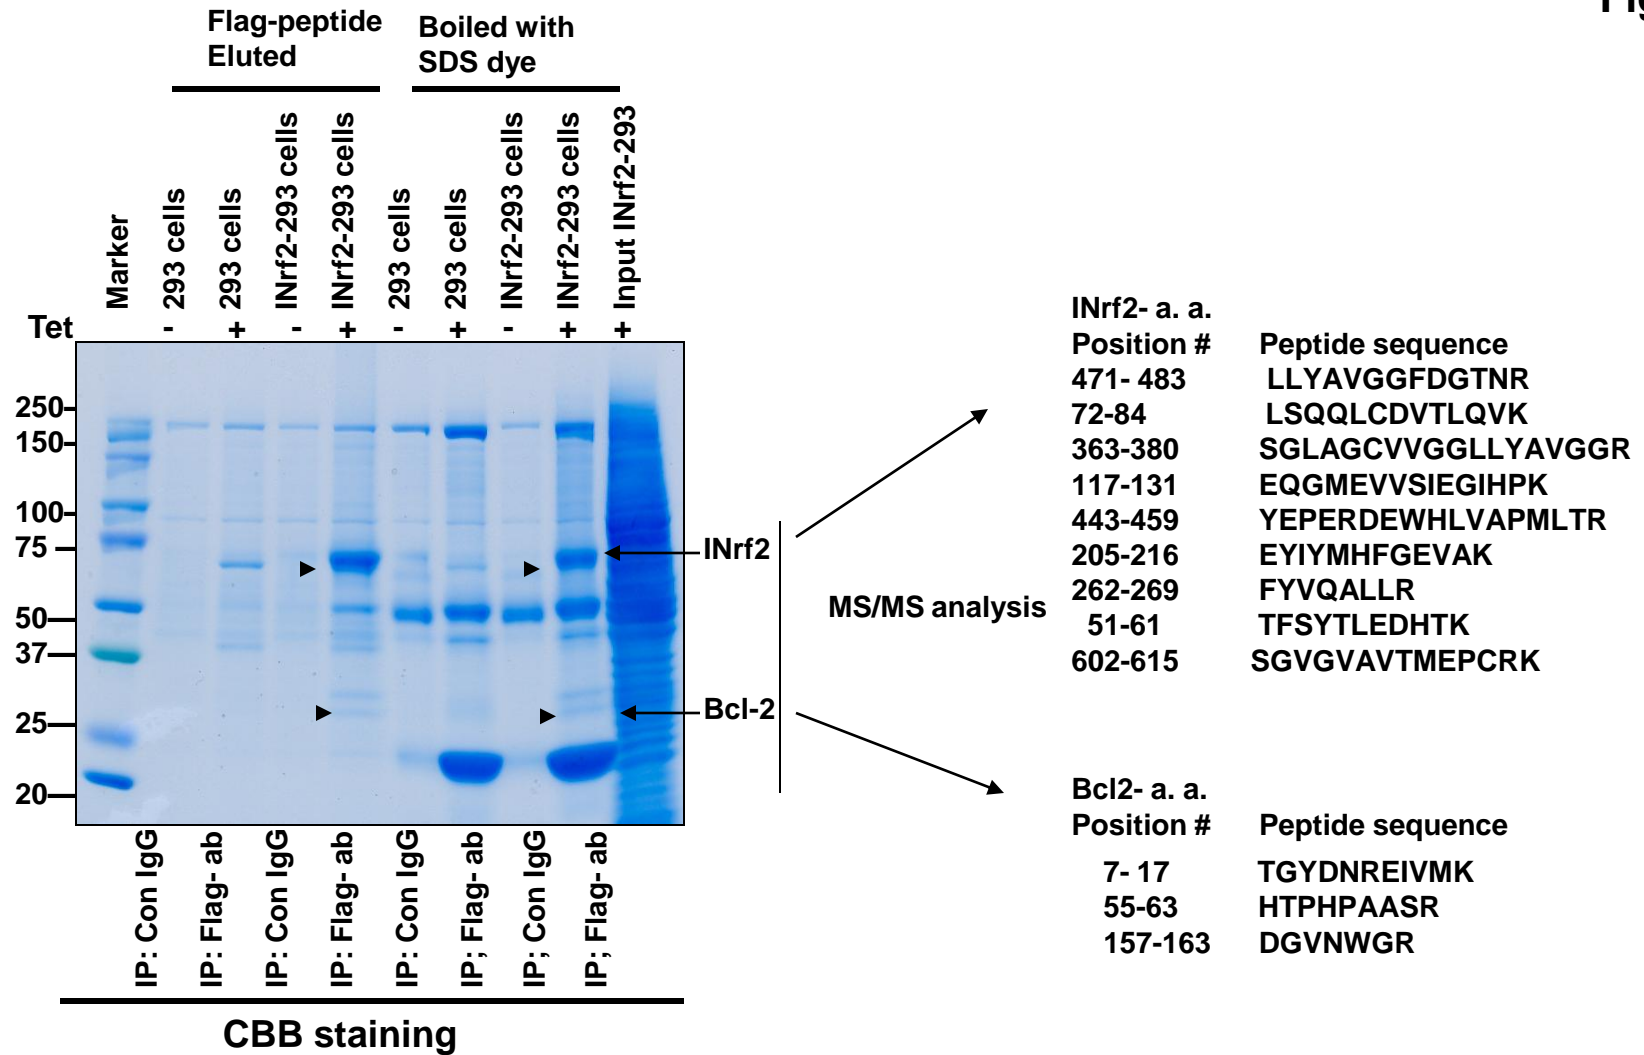

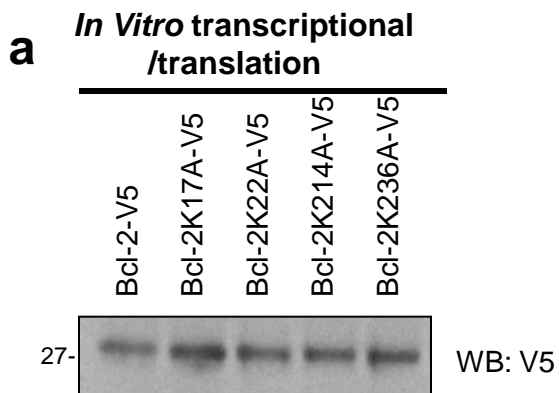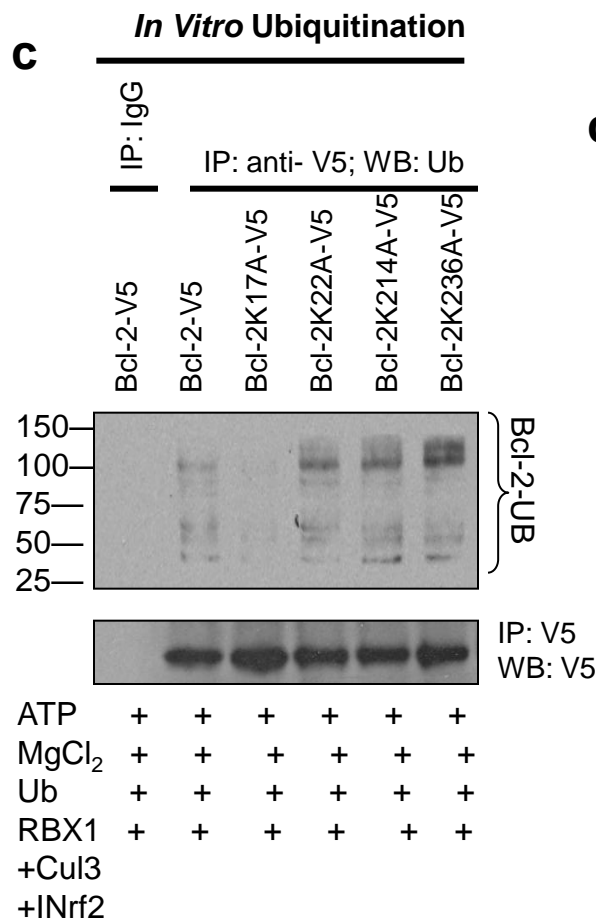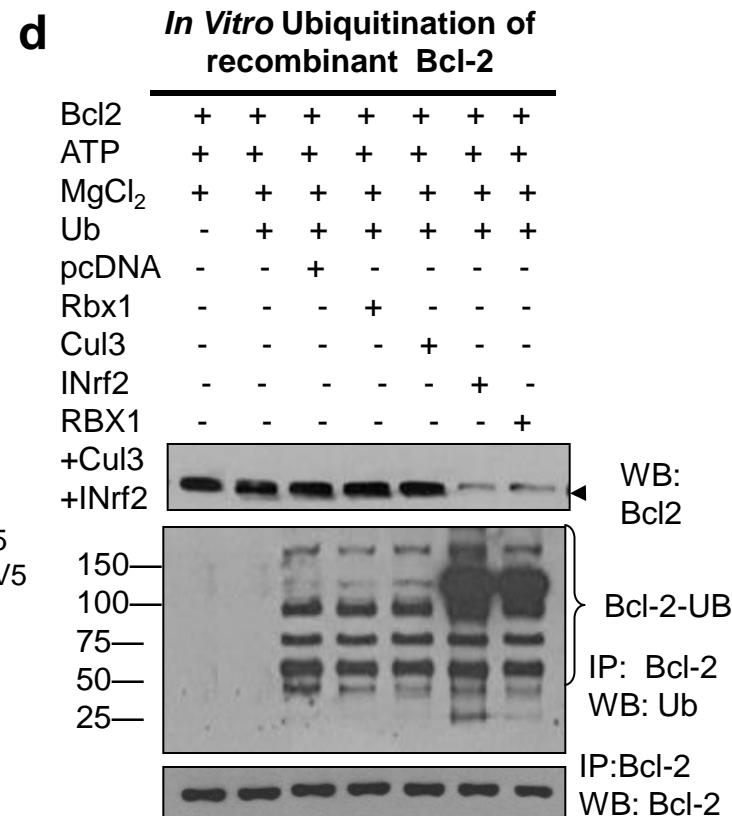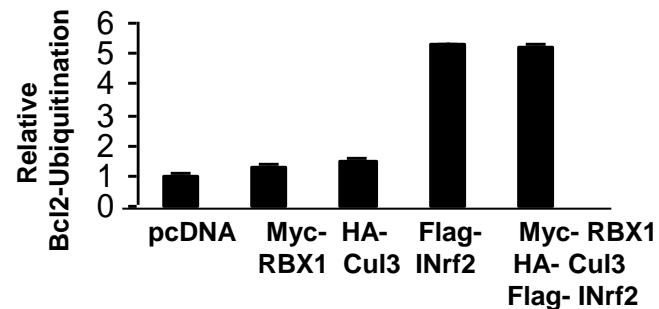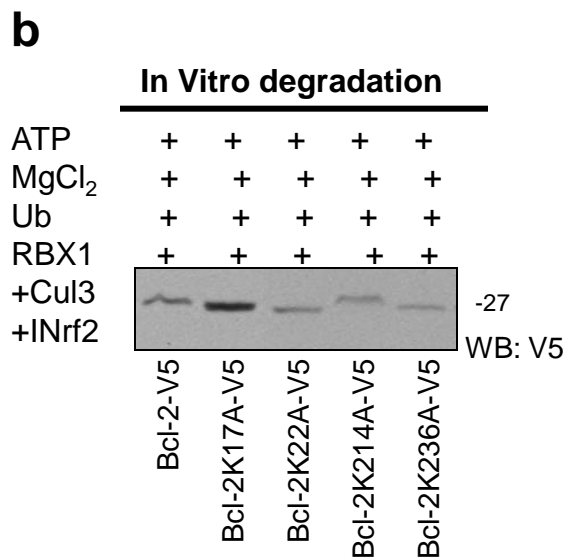

**a**

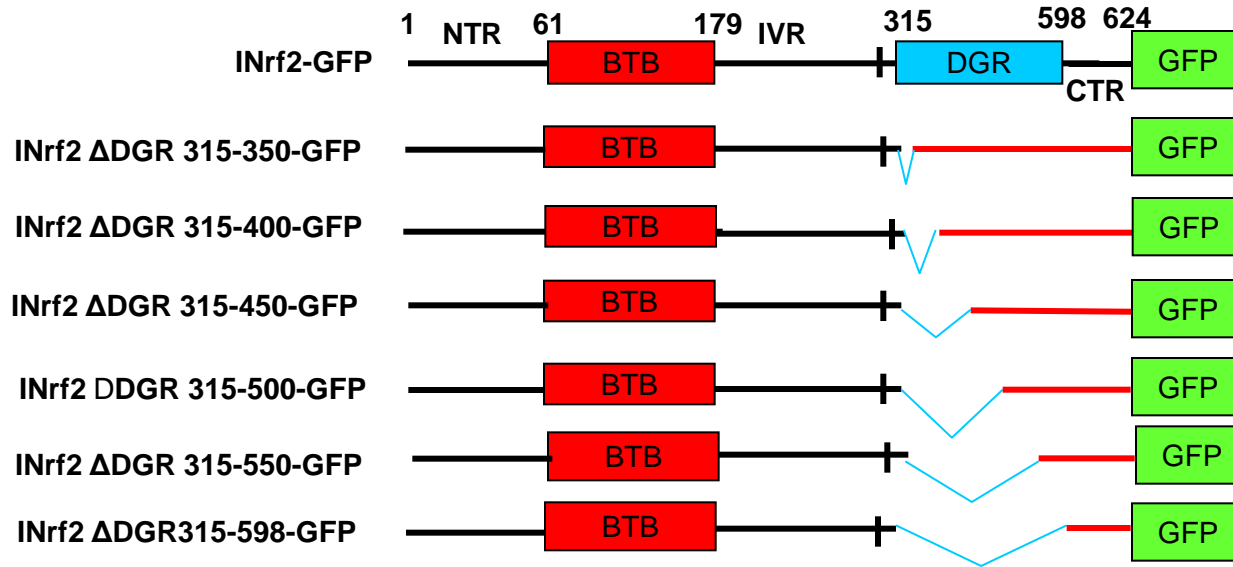

**b**

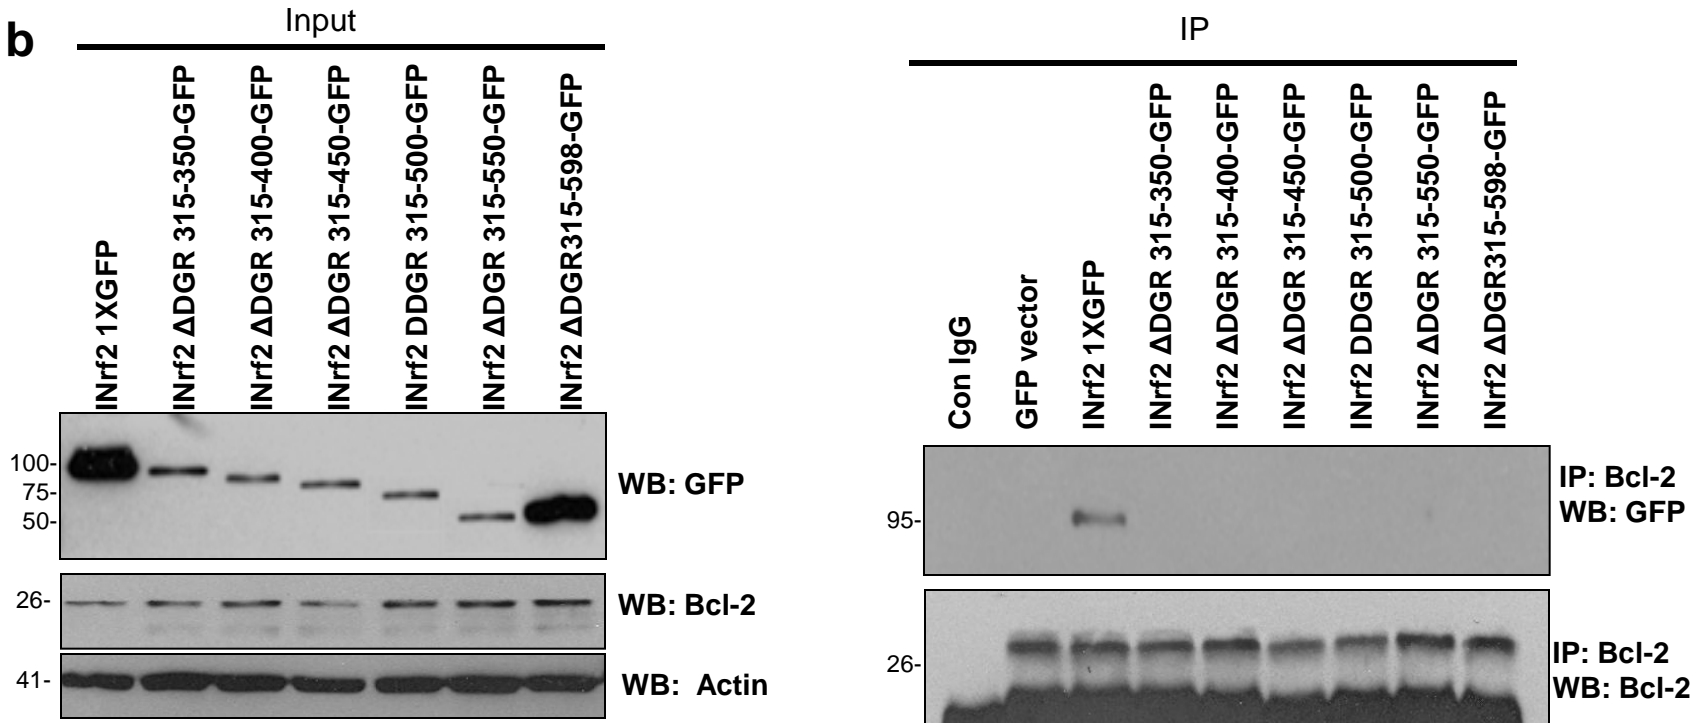

Figure S4

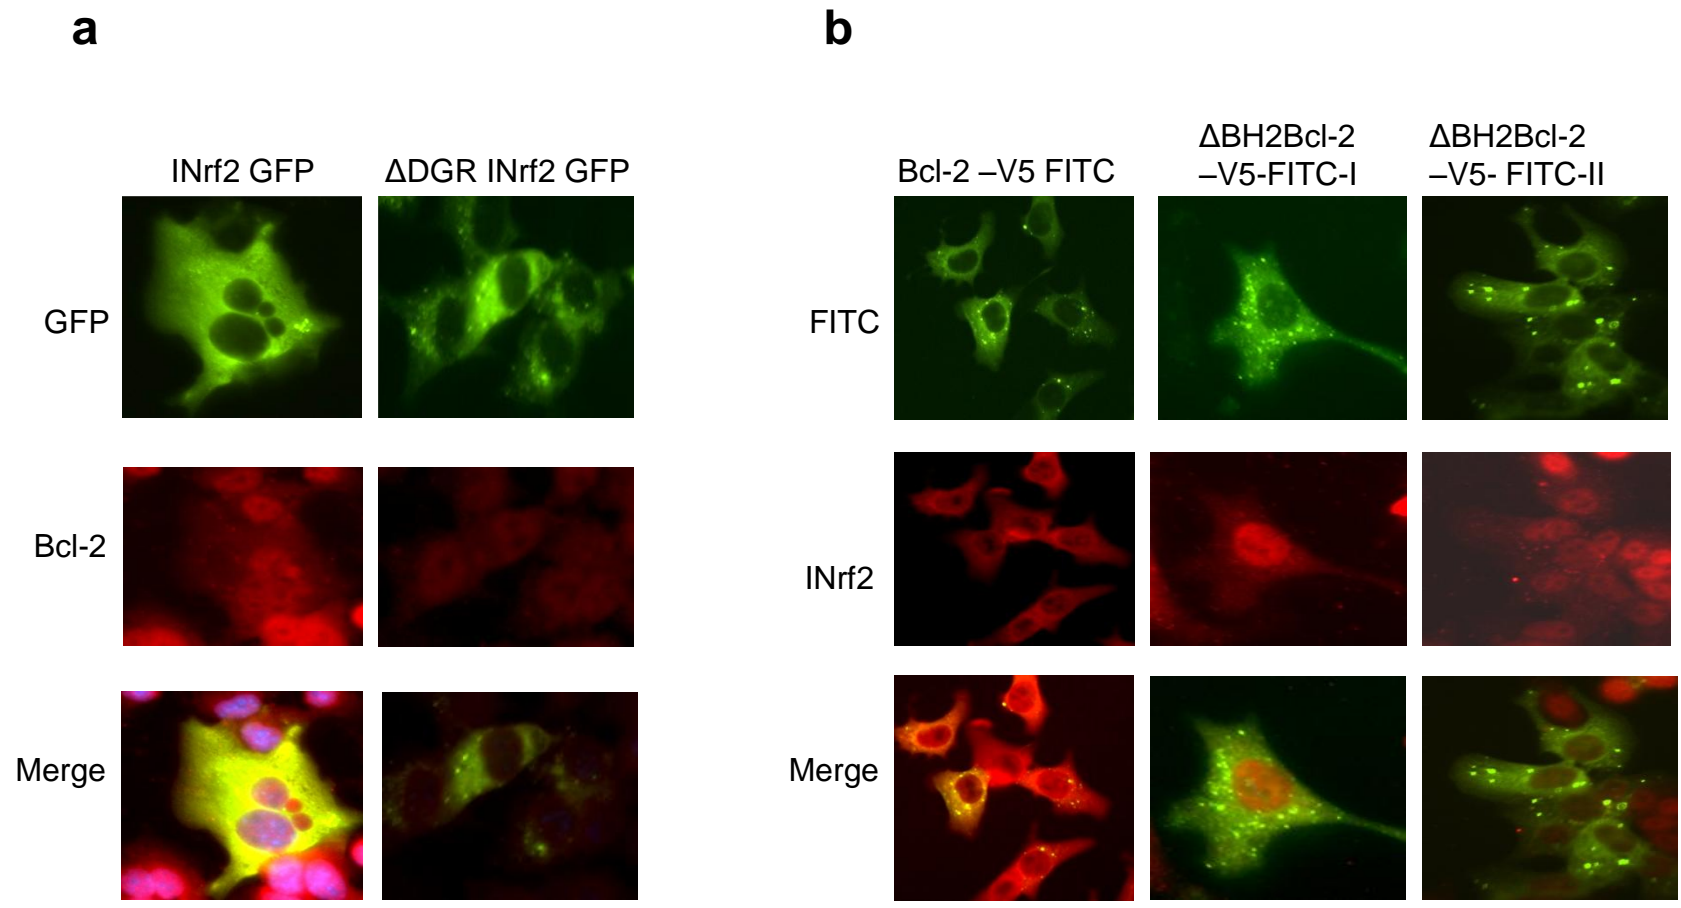

**Figure S5**

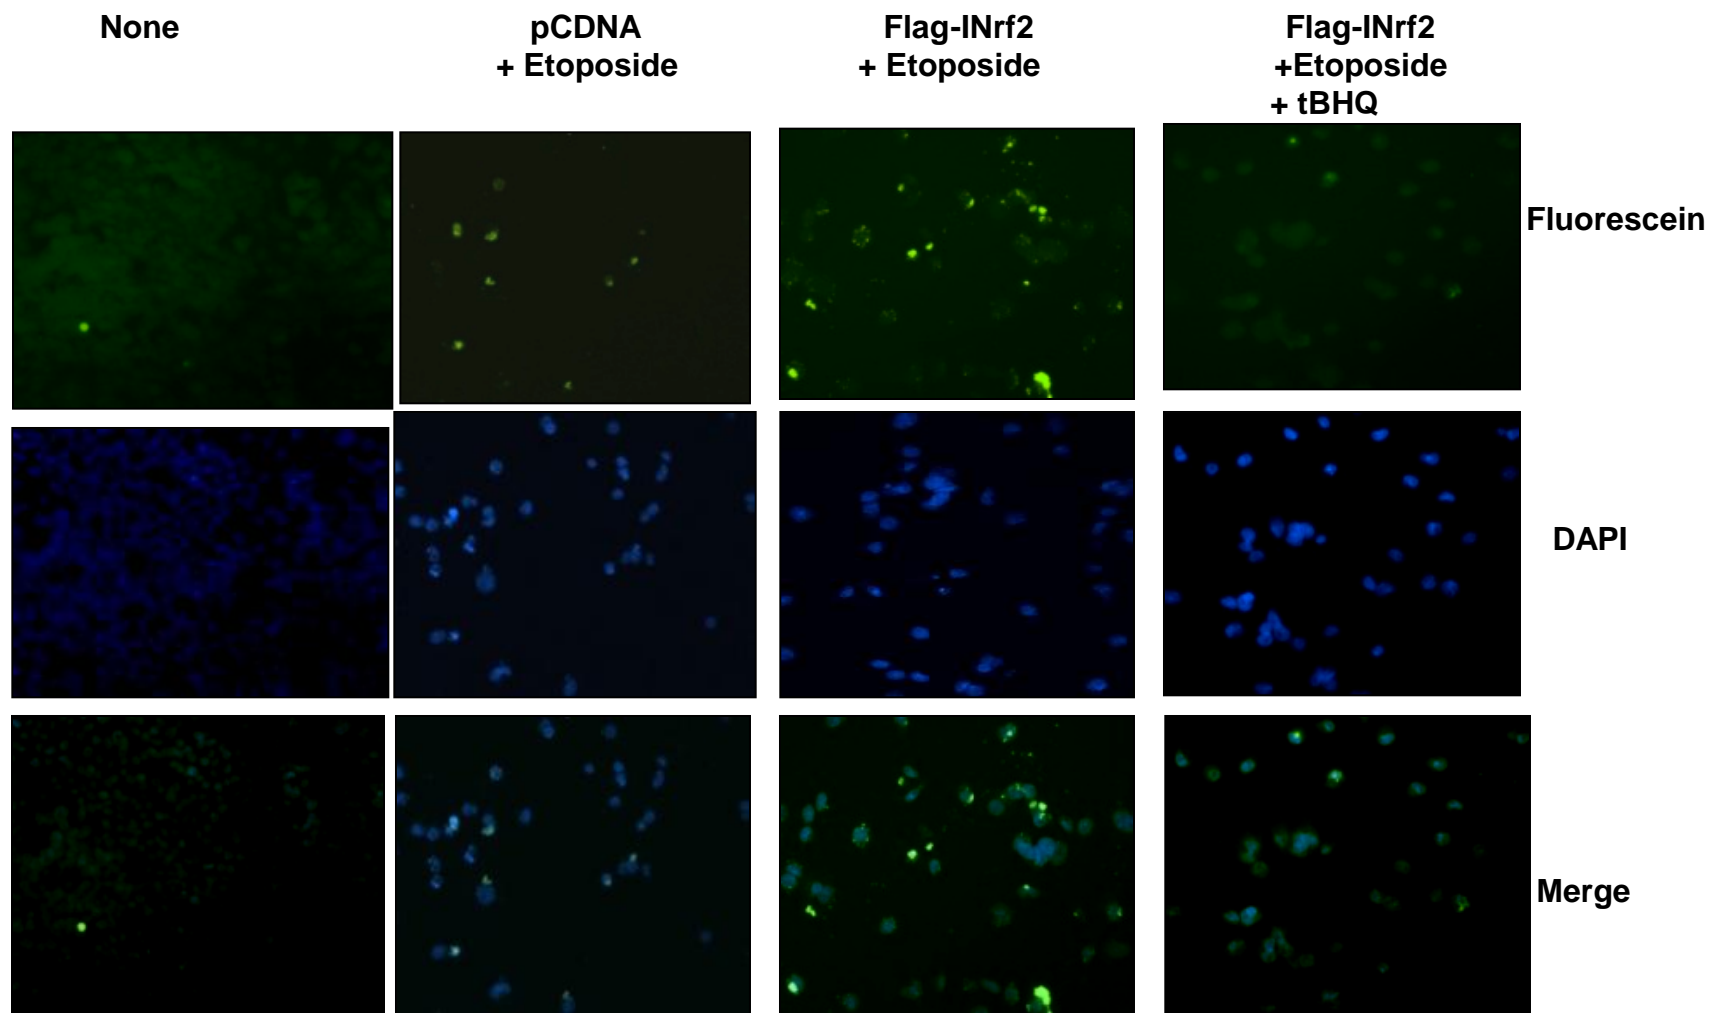

**a**

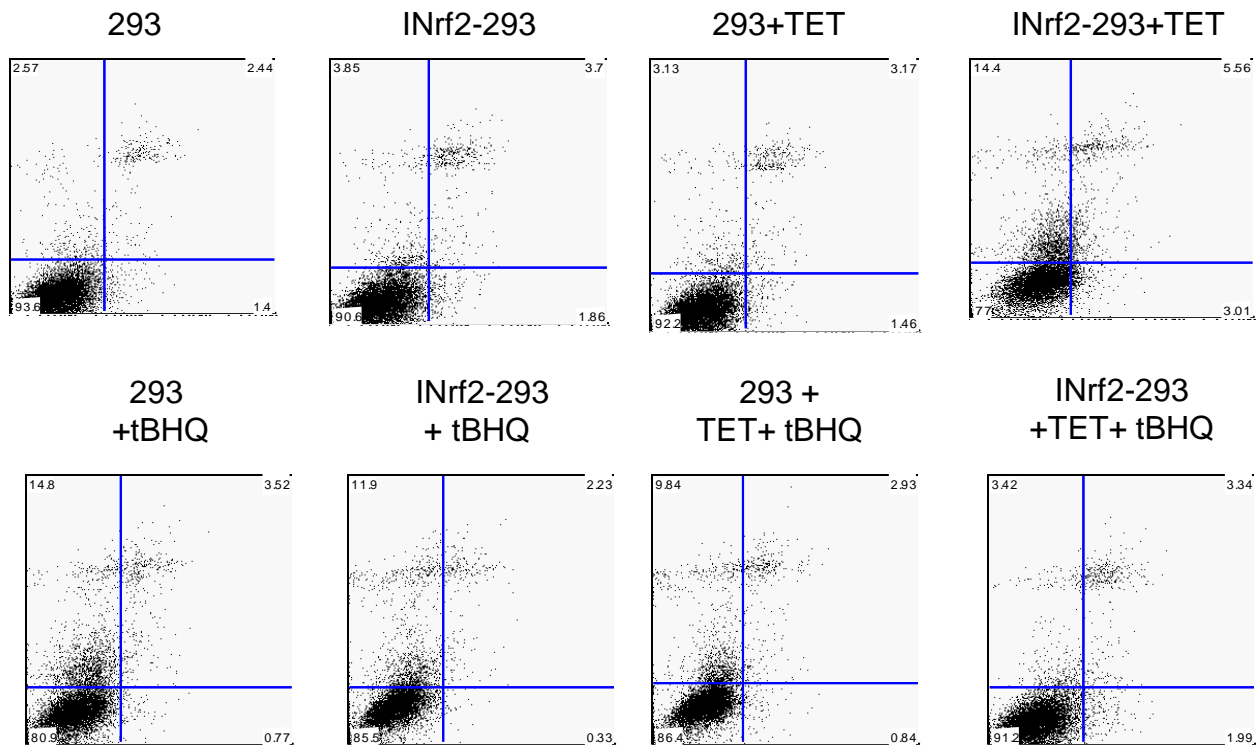

**b**

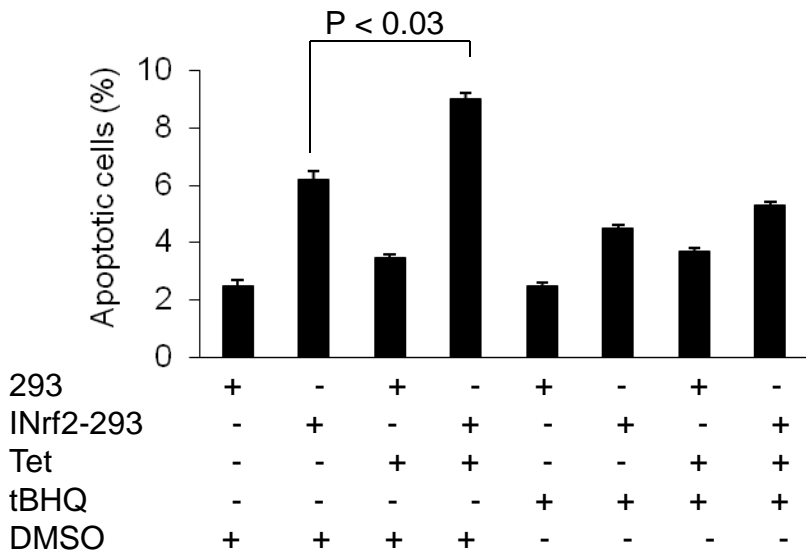

**c**

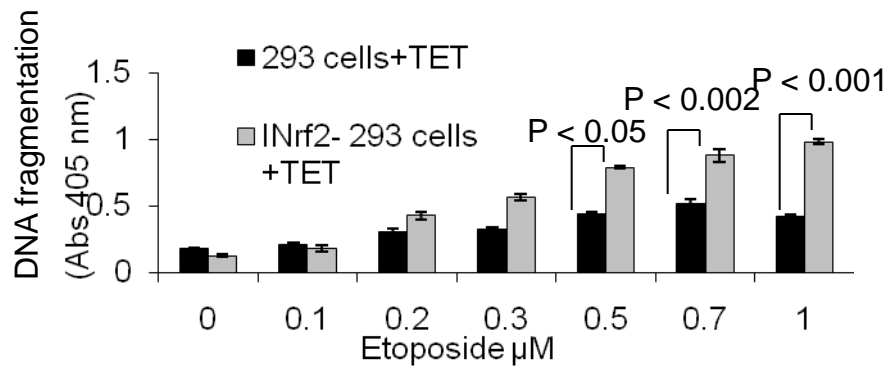

Figure S7

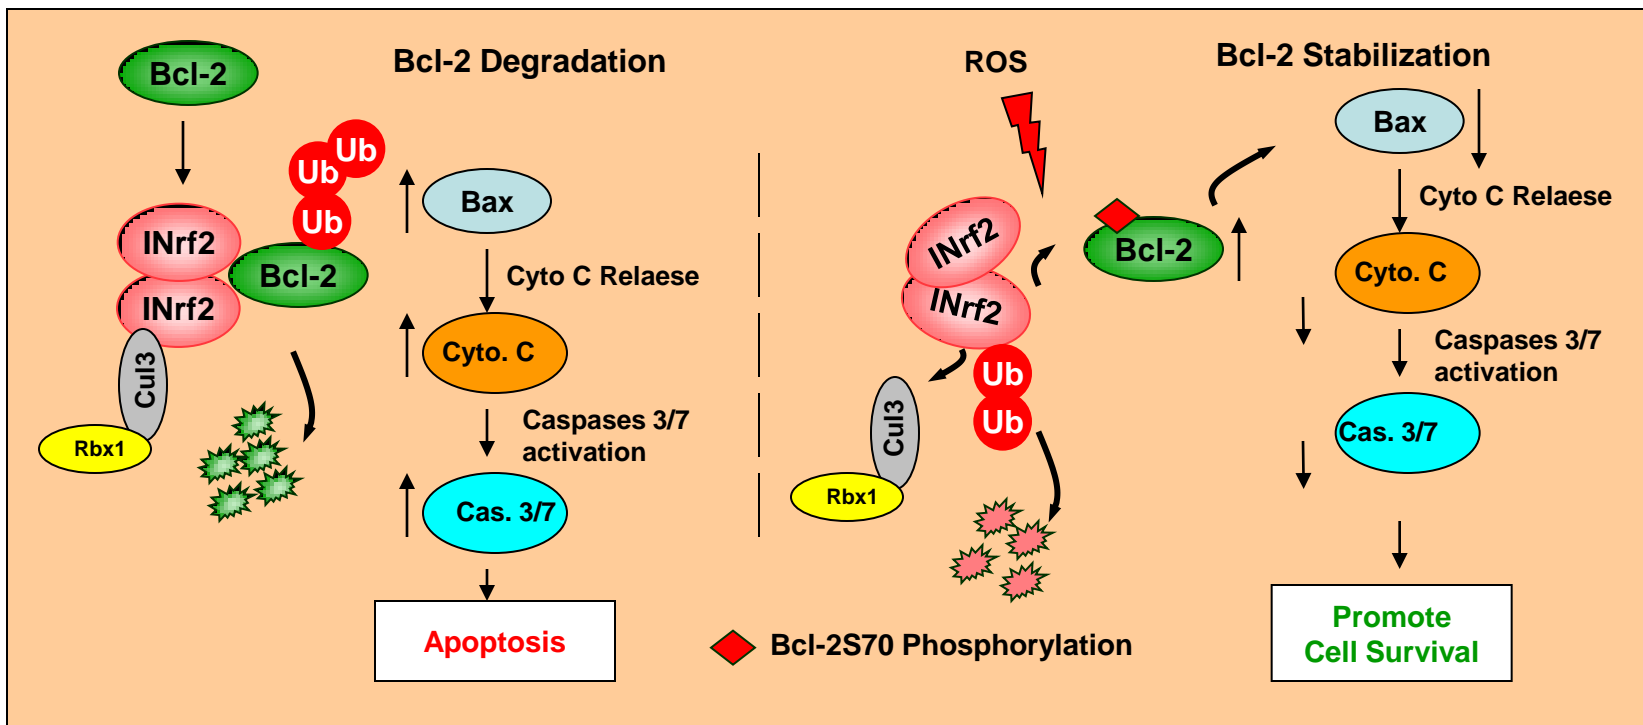

Supplement: cdd2010114x1.pdf [file cdd2010114x1.pdf]
